# Supplementary material for: Co-expression Profiling of Autism Genes in the Mouse Brain
Source: PLoS Comput Biol. 2013 Jul 25;9(7):e1003128. doi: 10.1371/journal.pcbi.1003128 (PMC3723491; doi:10.1371/journal.pcbi.1003128)
Supplement: Table S1 — AutRef84: A Reference set of Rare and Syndromic ASD-linked genes. (XLSX) [file pcbi.1003128.s003.xlsx]

## Sheet: AutRef84
Gene Symbol	Primary Reference	Author	Date	Entrez GeneID	Chromosome Number	UniprotID	Genetic Category	Reference PMID	Number of Primary References	AutDB Confidence of Association
A2BP1	Strong association of de novo copy number mutations with autism.	Sebat J	2007 Apr	54715	16	Q9NWB1	Rare single gene mutation / Association	17363630	2	Strong candidate
ADSL	Two novel mutant human adenylosuccinate lyases (ASLs) associated with autism and characterization of the equivalent mutant Bacillus subtilis ASL.	Sivendran S	2004 Dec	158	22	P30566	Syndromic autism	15471876	4	Strong candidate
AGTR2	AGTR2 mutations in X-linked mental retardation.	Vervoort VS	2002 Jun 28	186	X	P50052	Syndromic autism	12089445	1	Suggestive evidence
AHI1	Association of common variants in the Joubert syndrome gene (AHI1) with autism.	Alvarez Retuerto AI	2008 Dec	54806	6	Q8N157	Syndromic/Association	18782849	2	Strong candidate
ALDH5A1	Clinical spectrum of succinic semialdehyde dehydrogenase deficiency.	Pearl PL	2003 May 13	7915	6	P51649	Syndromic autism	12743223	1	Suggestive evidence
ANKRD11	Structural variation of chromosomes in autism spectrum disorder.	Marshall CR	2008 Feb	29123	16	Q6UB99	Rare single gene mutation	18252227	1	Suggestive evidence
APC	Adenomatous polyposis coli and a cytogenetic deletion of chromosome 5 resulting from a maternal intrachromosomal insertion.	Barber JC	1994 Apr	324	5	P25054	Rare single gene mutation / Association	8071957	2	Strong candidate
ARX	The ARX story (epilepsy, mental retardation, autism, and cerebral malformations): one gene leads to many phenotypes.	Sherr EH	2003 Dec	170302	X	Q96QS3	Syndromic autism	14631200	3	Strong candidate
ASTN2	Autism genome-wide copy number variation reveals ubiquitin and neuronal genes.	Glessner JT	2009 May 28	23245	9	O75129	Rare single gene mutation	19404257	1	Strong candidate
AUTS2	Identification of a novel gene on chromosome 7q11.2 interrupted by a translocation breakpoint in a pair of autistic twins.	Sultana R	2002 Aug	26053	7	Q5D049	Rare single gene mutation	12160723	1	Strong candidate
BZRAP1	Genome-wide analyses of exonic copy number variants in a family-based study point to novel autism susceptibility genes.	Bucan M	2009 Jun	9256	17	O95153	Rare single gene mutation	19557195	1	Suggestive evidence
C3orf58	Identifying autism loci and genes by tracing recent shared ancestry.	Morrow EM	2008 Jul	205428	3	Q8NDZ4	Rare single gene mutation	18621663	1	Suggestive evidence
CA6	Genome-wide analyses of exonic copy number variants in a family-based study point to novel autism susceptibility genes	Bucan M	2009 Jun	765	1	P23280	Rare single gene mutation	19557195	1	Suggestive evidence
CACNA1C	Ca(V)1.2 calcium channel dysfunction causes a multisystem disorder including arrhythmia and autism.	Splawski I	2004 Oct	775	12	O95234	Syndromic autism	15454078	1	Strong candidate
CACNA1F	A beta2 adrenergic receptor signaling complex assembled with the Ca2+ channel Cav1.2.	Davare MA	2001 Jul	778	X	O60840	Syndromic autism	11441182	1	Strong candidate
CACNA1H	CACNA1H mutations in autism spectrum disorders.	Splawski I	2006 Aug	8912	16	O95180	Rare single gene mutation	16754686	1	Suggestive evidence
CADM1	Mutations in the gene encoding CADM1 are associated with autism spectrum disorder.	Zhiling Y	2008 Dec	23705	11	Q9BY67	Rare single gene mutation	18957284	1	Suggestive evidence
CDKL5	Mutations of CDKL5 cause a severe neurodevelopmental disorder with infantile spasms and mental retardation.	Weaving LS	2004 Dec	6792	X	O76039	Syndromic autism	15492925	3	Strong candidate
CENTG2	Evaluation of the chromosome 2q37.3 gene CENTG2 as an autism susceptibility gene.	Wassink TH	2005 Jul	116987	2	Q4ZG22	Rare single gene mutation / Association	15892143	1	Suggestive evidence
CNTN4	Disruption of contactin 4 in three subjects with autism spectrum disorder.	Roohi J	2009 Mar	152330	3	Q8IWV2	Rare single gene mutation	18349135	3	Strong candidate
CNTNAP2	A common genetic variant in the neurexin superfamily member CNTNAP2 increases familial risk of autism.	Arking DE	2008 Jan	26047	7	Q9UHC6.1	Rare single gene mutation / Association	18179894	3	Strong candidate
DHCR7	The near universal presence of autism spectrum disorders in children with Smith-Lemli-Opitz syndrome.	Sikora DM	2006 Jul	1717	11	Q9UBM7	Syndromic autism	16761297	4	Strong candidate
DLGAP2	Structural variation of chromosomes in autism spectrum disorder.	Marshall CR	2008 Feb	9228	8	Q9P1A6	Rare single gene mutation	18252227	1	Suggestive evidence
DMD	Association of Duchenne muscular dystrophy with autism spectrum disorder.	Wu JY	2005 Oct	1756	X	P11532	Syndromic autism	16417872	6	Strong candidate
DMPK	Autism spectrum conditions in myotonic dystrophy type 1: a study on 57 individuals with congenital and childhood forms.	Ekström AB	2008 Sep	1760	19	Q09013	Syndromic autism	18228241	1	Strong candidate
DPP10	Structural variation of chromosomes in autism spectrum disorder.	Marshall CR	2008 Feb	57628	2	Q8N608.1	Rare single gene mutation	18252227	1	Suggestive evidence
DPP6	Structural variation of chromosomes in autism spectrum disorder.	Marshall CR	2008 Feb	1804	7	P42658.1	Rare single gene mutation	18252227	1	Suggestive evidence
DPYD	Structural variation of chromosomes in autism spectrum disorder.	Marshall CR	2008 Feb	1806	1		Rare single gene mutation	18252227	1	Suggestive evidence
EIF4E	Deregulation of EIF4E: a novel mechanism for autism.	Neves-Pereira M	2009 Nov	1977	4	P06730	Rare single gene mutation	19556253	1	Suggestive evidence
FABP5	Polymorphism screening of brain-expressed FABP7, 5 and 3 genes and association studies in autism and schizophrenia in Japanese subjects.	Maekawa M	2010 Feb	2171	8	Q01469	Rare single gene mutation / Association	20057506	1	Suggestive evidence
FABP7	Polymorphism screening of brain-expressed FABP7, 5 and 3 genes and association studies in autism and schizophrenia in Japanese subjects.	Maekawa M	2010 Feb	2173	6	O15540	Rare single gene mutation / Association	20057506	1	Suggestive evidence
FBXO40	Autism genome-wide copy number variation reveals ubiquitin and neuronal genes.	Glessner JT	2009 May 28	51725	3	Q9UH90	Rare single gene mutation	19404257	1	Suggestive evidence
FHIT	Strong association of de novo copy number mutations with autism.	Sebat J	2007 Apr	2272	3	P49789	Rare single gene mutation	17363630	1	Suggestive evidence
FMR1	Autism: the point of view from fragile X studies	Feinstein C	1998 Oct	2332	x	Q06787	Syndromic autism	9813775	>10	Strong candidate
GALNT13	Genome-wide analyses of exonic copy number variants in a family-based study point to novel autism susceptibility genes	Bucan M	2009 Jun	114805	2	Q8IUC8	Rare single gene mutation	19557195	1	Suggestive evidence
GRPR	Autism and multiple exostoses associated with an X;8 translocation occurring within the GRPR gene and 3' to the SDC2 gene.	Ishikawa-Brush Y	1997 Aug	2925	X	P30550	Rare single gene mutation	9259269	2	Suggestive evidence
IL1RAPL1	Disruption of the IL1RAPL1 gene associated with a pericentromeric inversion of the X chromosome in a patient with mental retardation and autism.	Bhat SS	2008 Jan	11141	X	Q9NZN1	Rare single gene mutation	18005360	1	Strong candidate
IMMP2L	Disruption of a novel gene (IMMP2L) by a breakpoint in 7q31 associated with Tourette syndrome.	Petek E	2001 Apr	83943	7	Q96HJ2	Rare single gene mutation / Association	11254443	1	Strong candidate
JMJD1C	Identification and characterization of the TRIP8 and REEP3 genes on chromosome 10q21.3 as novel candidate genes for autism.	Castermans D	2007 Apr	221037	10	Q15652	Rare single gene mutation	17290275	1	Suggestive evidence
KCNMA1	Association of a functional deficit of the BKCa channel, a synaptic regulator of neuronal excitability, with autism and mental retardation.	Laumonnier F	2006 Sep	3778	10	Q12791	Rare single gene mutation	16946189	1	Suggestive evidence
KIAA1586	Genome-wide analyses of exonic copy number variants in a family-based study point to novel autism susceptibility genes.	Bucan M	2009 Jun	57691	6	Q8N303	Rare single gene mutation	19557195	1	Suggestive evidence
MBD1	Novel variants identified in methyl-CpG-binding domain genes in autistic individuals.	Cukier HN	2010 Jul	4152	18	Q9UIS9	Rare single gene mutation	19921286	1	Suggestive evidence
MBD3	Novel variants identified in methyl-CpG-binding domain genes in autistic individuals.	Cukier HN	2010 Jul	53615	19	O95983	Rare single gene mutation	19921286	1	Suggestive evidence
MBD4	Novel variants identified in methyl-CpG-binding domain genes in autistic individuals.	Cukier HN	2010 Jul	8930	3	O95243	Rare single gene mutation	19921286	1	Suggestive evidence
MCPH1	Copy number changes of the microcephalin 1 gene (MCPH1) in patients with autism spectrum disorders	Ozgen HM	2009 Oct	79648	8	Q8NEM0	Rare single gene mutation	19793310	1	Suggestive evidence
MDGA2	Genome-wide analyses of exonic copy number variants in a family-based study point to novel autism susceptibility genes.	Bucan M	2009 Jun	161357	14	Q7Z553	Rare single gene mutation	19557195	1	Suggestive evidence
MECP2	Rett syndrome is caused by mutations in X-linked MECP2, encoding methyl-CpG-binding protein 2.	Amir RE	1999 Oct	4204	X	P51608	Syndromic autism	10508514	>10	Strong candidate
NBEA	The neurobeachin gene is disrupted by a translocation in a patient with idiopathic autism.	Castermans D	2003 May	26960	13	Q5W0E6	Rare single gene mutation	12746398	1	Suggestive evidence
NF1	Association between the neurofibromatosis-1 (NF1) locus and autism in the Japanese population.	Marui T	2004 Nov	4763	17	P21359	Syndromic autism	15389774	3	Strong candidate
NLGN1	Autism genome-wide copy number variation reveals ubiquitin and neuronal genes.	Glessner JT	2009 May 28	22871	3	Q8N2Q7	Rare single gene mutation	19404257	1	Strong candidate
NLGN3	Mutations of the X-linked genes encoding neuroligins NLGN3 and NLGN4 are associated with autism.	Jamain S	2003 May	54413	X	Q9NZ94	Rare single gene mutation	12669065	6	Strong candidate
NLGN4X	Mutations of the X-linked genes encoding neuroligins NLGN3 and NLGN4 are associated with autism.	Jamain S	2003 May	57502	X	Q8N0W4	Rare single gene mutation	12669065	8	Strong candidate
NRXN1	Mapping autism risk loci using genetic linkage and chromosomal rearrangements.	Szatmari P	2007 Mar	9378	2	P58400	Rare single gene mutation	17322880	1	Strong candidate
NTNG1	Disruption of Netrin G1 by a balanced chromosome translocation in a girl with Rett syndrome.	Borg I	2005 Aug	22854	1	Q9Y2I2	Syndromic autism	15870826	1	Suggestive evidence
ODF3L2	Genome-wide analyses of exonic copy number variants in a family-based study point to novel autism susceptibility genes.	Bucan M	2009 Jun	284451	19	Q3SX64	Rare single gene mutation	19557195	1	Suggestive evidence
OR1C1	Genome-wide analyses of exonic copy number variants in a family-based study point to novel autism susceptibility genes.	Bucan M	2009 Jun	26188	1	Q15619	Rare single gene mutation	19557195	1	Suggestive evidence
PARK2	Autism genome-wide copy number variation reveals ubiquitin and neuronal genes.	Glessner JT	2009 May 28	5071	6	O60260	Rare single gene mutation	19404257	1	Suggestive evidence
PCDH10	Identifying autism loci and genes by tracing recent shared ancestry.	Morrow EM	2008 Jul	57575	4	Q9P2E7	Rare single gene mutation	18621663	1	Suggestive evidence
PCDH9	Structural variation of chromosomes in autism spectrum disorder.	Marshall CR	2008 Feb	5101	13	Q9HC56	Rare single gene mutation	18252227	1	Suggestive evidence
PLN	Structural variation of chromosomes in autism spectrum disorder.	Marshall CR	2008 Feb	5350	6	P26678	Rare single gene mutation	18252227	1	Suggestive evidence
PTCHD1	Structural variation of chromosomes in autism spectrum disorder.	Marshall CR	2008 Feb	139411	X	Q96NR3	Rare single gene mutation	18252227	1	Strong candidate
PTEN	PTEN mutation in a family with Cowden syndrome and autism.	Goffin A	2001 Aug	5728	10	P60484	Syndromic autism	11496368	2	Strong candidate
RAB39B	Mutations in the small GTPase gene RAB39B are responsible for X-linked mental retardation associated with autism, epilepsy, and macrocephaly.	Giannandrea M	2010 Feb	116442	X	Q96DA2	Rare single gene mutation / Association	20159109	1	Strong candidate
RAPGEF4	Screening of nine candidate genes for autism on chromosome 2q reveals rare nonsynonymous variants in the cAMP-GEFII gene.	Bacchelli E	2003 Nov	11069	2	Q53QY2	Rare single gene mutation; No Association	14593429	1	Suggestive evidence
RB1CC1	Structural variation of chromosomes in autism spectrum disorder.	Marshall CR	2008 Feb	9821	8	Q8TDY2	Rare single gene mutation	18252227	1	Suggestive evidence
REEP3	Identification and characterization of the TRIP8 and REEP3 genes on chromosome 10q21.3 as novel candidate genes for autism.	Castermans D	2007 Apr	221035	10		Rare single gene mutation	17290275	1	Suggestive evidence
RFWD2	Autism genome-wide copy number variation reveals ubiquitin and neuronal genes.	Glessner JT	2009 May 28	64326	1	Q8NHY2	Rare single gene mutation	19404257	1	Suggestive evidence
RIMS3	A de novo 1p34.2 microdeletion identifies the synaptic vesicle gene RIMS3 as a novel candidate for autism.	Kumar RA	2010 Feb	9783	1	Q9UJD0	Rare single gene mutation	19546099	1	Suggestive evidence
RPL10	Mutations in the ribosomal protein gene RPL10 suggest a novel modulating disease mechanism for autism.	Klauck SM	2006 Dec	6134	X	P27635	Rare single gene mutation	16940977	1	Suggestive evidence
RPS6KA2	Structural variation of chromosomes in autism spectrum disorder.	Marshall CR	2008 Feb	6196	6	Q15349	Rare single gene mutation	18252227	1	Suggestive evidence
SCN1A	Sodium channels SCN1A, SCN2A and SCN3A in familial autism.	Weiss LA	2003 Feb	6323	2	P35498	Rare single gene mutation	12610651	1	Suggestive evidence
SCN2A	Sodium channels SCN1A, SCN2A and SCN3A in familial autism.	Weiss LA	2003 Feb	6326	2	Q99250	Rare single gene mutation	12610651	1	Suggestive evidence
SEZ6L2	Association and mutation analyses of 16p11.2 autism candidate genes.	Kumar RA	2009	26470	16	Q6UXD5	Rare single gene mutation	19242545	1	Suggestive evidence
SHANK3	Mutations in the gene encoding the synaptic scaffolding protein SHANK3 are associated with autism spectrum disorders.	Durand CM	2007 Jan	85358	22	Q9BYB0	Rare single gene mutation	17173049	4	Strong candidate
SLC4A10	Strong association of de novo copy number mutations with autism.	Sebat J	2007 Apr	57282	2	Q6U841	Rare single gene mutation	17363630	1	Suggestive evidence
SLC6A8	X-Linked creatine transporter deficiency in two patients with severe mental retardation and autism.	Póo-Argüelles P	2006 Feb	6535	X	P48029	Syndromic autism	16601898	1	Strong candidate
SLC9A9	Identifying autism loci and genes by tracing recent shared ancestry.	Morrow EM	2008 Jul	285195	3	Q8IVB4	Rare single gene mutation	18621663	1	Suggestive evidence
ST7	Identification of a novel gene on chromosome 7q31 that is interrupted by a translocation breakpoint in an autistic individual.	Vincent JB	2000 Aug	7982	7	Q5CZ72	Rare single gene mutation	10889047	1	Suggestive evidence
SUCLG2	Genome-wide analyses of exonic copy number variants in a family-based study point to novel autism susceptibility genes.	Bucan M	2009 Jun	8801	3	Q96I99	Rare single gene mutation	19557195	1	Suggestive evidence
TMEM195	Strong association of de novo copy number mutations with autism.	Sebat J	2007 Apr	392636	7	Q6ZNB7	Rare single gene mutation	17363630	1	Suggestive evidence
TSC1	Autism and tuberous sclerosis.	Smalley SL	1998 Oct	7248	9	Q59IT9	Syndromic autism	9813776	>10	Strong candidate
TSC2	Autism and tuberous sclerosis.	Smalley SL	1998 Oct	7249	16	P49815	Syndromic autism	9813776	>10	Strong candidate
UBE3A	Linkage disequilibrium at the Angelman syndrome gene UBE3A in autism families.	Nurmi EL	2001 Sep	7337	15	Q05086	Rare single gene mutation / Association	11543639	2	Strong candidate
XPC	Xeroderma pigmentosum group C splice mutation associated with autism and hypoglycinemia.	Khan SG	1998 Nov	7508	3	Q01831	Syndromic autism	9804340	2	Suggestive evidence
