# Supplementary material for: Co-expression Profiling of Autism Genes in the Mouse Brain
Source: PLoS Comput Biol. 2013 Jul 25;9(7):e1003128. doi: 10.1371/journal.pcbi.1003128 (PMC3723491; doi:10.1371/journal.pcbi.1003128)
Supplement: Table S2 — Co-expression of genes in Clique I. The pairwise co-expression values between all 33 genes in Clique I are depicted and color-coded. The four genes already associated with autism are highlighted in yellow. (XLSX) [file pcbi.1003128.s004.xlsx]

## Sheet: Clique 1
gene name	Official symbole	Atp1a1	Chgb	LOC434631	Syne1	Tmem109	Dpp6	Prpf38b	Socs5	Car4	Camk2d	Edg1	Slc6a1	Pcbp4	BC060632	Pltp	Gpr37l1	Pla2g7	Daam2	Syt2	Darc	Slc12a3	B230317C12Rik	0610007P14Rik	Cnr1	Galnt13	Mpp3	D530033C11Rik	Coro2b	Trim3	C230009H10Rik	Astn2	Grm4	Ptchd1
Atp1a1	Atp1a1	1	0.943972	0.937616	0.91308	0.917638	0.910073	0.911147	0.891501	0.906442	0.879514	0.862134	0.87307	0.874096	0.847691	0.83056	0.809675	0.829561	0.832895	0.799149	0.849823	0.855559	0.803805	0.813051	0.77237	0.722753	0.863595	0.840263	0.864851	0.867596	0.816832	0.789905	0.822173	0.770056
Chgb	Chgb	0.943972	1	0.921809	0.908673	0.899465	0.931447	0.910603	0.905071	0.905577	0.907932	0.852136	0.86752	0.895982	0.864182	0.821301	0.820241	0.852145	0.860566	0.790972	0.836167	0.855758	0.810921	0.798084	0.743895	0.713405	0.824304	0.808889	0.824214	0.868205	0.810748	0.784867	0.815042	0.754298
LOC434631	LOC434631	0.937616	0.921809	1	0.906755	0.907399	0.873409	0.893196	0.887275	0.888719	0.848141	0.845676	0.867284	0.859025	0.826242	0.802393	0.803932	0.807277	0.821481	0.79574	0.830025	0.832573	0.813293	0.804913	0.781743	0.72136	0.859058	0.851696	0.880035	0.881619	0.833111	0.831629	0.832996	0.782504
Syne1	Syne1	0.91308	0.908673	0.906755	1	0.887278	0.894787	0.895227	0.868786	0.884838	0.857045	0.859307	0.86355	0.858742	0.82612	0.828001	0.832037	0.831024	0.819917	0.758595	0.810172	0.80403	0.795928	0.822788	0.775851	0.741847	0.84776	0.832484	0.861971	0.854748	0.825012	0.806754	0.838894	0.752774
Tmem109	Tmem109	0.917638	0.899465	0.907399	0.887278	1	0.87857	0.884109	0.858382	0.880422	0.855477	0.828756	0.843028	0.843619	0.835298	0.798884	0.793193	0.815437	0.817302	0.77297	0.792969	0.810841	0.766241	0.784446	0.747011	0.7049	0.8264	0.819936	0.824229	0.834179	0.805778	0.779836	0.780029	0.751194
Dpp6	Dpp6	0.910073	0.931447	0.873409	0.894787	0.87857	1	0.902116	0.877306	0.885276	0.90119	0.837238	0.858015	0.883498	0.867612	0.818273	0.814759	0.851036	0.864298	0.773035	0.784992	0.838463	0.768156	0.774551	0.74453	0.704657	0.7797	0.79182	0.78885	0.814472	0.762859	0.717846	0.759867	0.725921
Prpf38b	Prpf38b	0.911147	0.910603	0.893196	0.895227	0.884109	0.902116	1	0.889604	0.86835	0.880383	0.851445	0.847994	0.863014	0.839296	0.825964	0.819551	0.849825	0.853181	0.783149	0.814088	0.83057	0.779292	0.802627	0.760019	0.708956	0.833436	0.844493	0.829135	0.831665	0.815911	0.776344	0.808944	0.737721
Socs5	Socs5	0.891501	0.905071	0.887275	0.868786	0.858382	0.877306	0.889604	1	0.853518	0.871476	0.837108	0.842554	0.864029	0.838791	0.794857	0.810149	0.842931	0.840066	0.78949	0.807434	0.802108	0.817292	0.807446	0.756982	0.706385	0.831375	0.817842	0.807202	0.839213	0.810841	0.77395	0.796757	0.773328
Car4	Car4	0.906442	0.905577	0.888719	0.884838	0.880422	0.885276	0.86835	0.853518	1	0.890293	0.82466	0.837337	0.84951	0.831092	0.797292	0.814643	0.827565	0.822941	0.794262	0.850657	0.830375	0.779145	0.824075	0.718975	0.705252	0.832382	0.823236	0.841968	0.863003	0.83605	0.792893	0.802146	0.755437
Camk2d	Camk2d	0.879514	0.907932	0.848141	0.857045	0.855477	0.90119	0.880383	0.871476	0.890293	1	0.840925	0.842679	0.860067	0.859771	0.789363	0.806116	0.824882	0.819829	0.791344	0.830704	0.85007	0.740309	0.799931	0.721772	0.729967	0.785955	0.812872	0.765668	0.820663	0.807082	0.739682	0.775775	0.737588
Edg1	Edg1	0.862134	0.852136	0.845676	0.859307	0.828756	0.837238	0.851445	0.837108	0.82466	0.840925	1	0.899066	0.847873	0.860483	0.851061	0.883494	0.850354	0.818407	0.798051	0.790443	0.793767	0.773565	0.835452	0.798797	0.754218	0.80413	0.825971	0.818223	0.782132	0.799635	0.79817	0.826843	0.746865
Slc6a1	Slc6a1	0.87307	0.86752	0.867284	0.86355	0.843028	0.858015	0.847994	0.842554	0.837337	0.842679	0.899066	1	0.850824	0.883757	0.841124	0.864087	0.837633	0.817422	0.791297	0.779887	0.798074	0.804036	0.809415	0.789141	0.746916	0.797443	0.808525	0.813073	0.803406	0.804439	0.800121	0.798389	0.748973
Pcbp4	Pcbp4	0.874096	0.895982	0.859025	0.858742	0.843619	0.883498	0.863014	0.864029	0.84951	0.860067	0.847873	0.850824	1	0.870431	0.840398	0.842779	0.873712	0.865214	0.803401	0.768688	0.804306	0.799955	0.790569	0.7257	0.721184	0.767822	0.774732	0.777192	0.79783	0.777303	0.752163	0.803961	0.745538
BC060632	Mtss1	0.847691	0.864182	0.826242	0.82612	0.835298	0.867612	0.839296	0.838791	0.831092	0.859771	0.860483	0.883757	0.870431	1	0.84082	0.86135	0.864198	0.83983	0.797068	0.7544	0.783027	0.764658	0.788814	0.733738	0.713326	0.743711	0.768845	0.753496	0.772895	0.764561	0.75755	0.74683	0.722631
Pltp	Pltp	0.83056	0.821301	0.802393	0.828001	0.798884	0.818273	0.825964	0.794857	0.797292	0.789363	0.851061	0.841124	0.840398	0.84082	1	0.876112	0.897896	0.868689	0.794131	0.726483	0.756227	0.772799	0.776336	0.718068	0.738038	0.750628	0.757017	0.774914	0.753488	0.766915	0.757836	0.767142	0.715419
Gpr37l1	Gpr37l1	0.809675	0.820241	0.803932	0.832037	0.793193	0.814759	0.819551	0.810149	0.814643	0.806116	0.883494	0.864087	0.842779	0.86135	0.876112	1	0.885335	0.848302	0.809321	0.752877	0.761216	0.782624	0.82829	0.761681	0.756894	0.764775	0.783734	0.793366	0.764523	0.795717	0.795571	0.80199	0.735248
Pla2g7	Pla2g7	0.829561	0.852145	0.807277	0.831024	0.815437	0.851036	0.849825	0.842931	0.827565	0.824882	0.850354	0.837633	0.873712	0.864198	0.897896	0.885335	1	0.91478	0.832935	0.747589	0.766288	0.803432	0.797585	0.701582	0.722679	0.753822	0.754192	0.762041	0.775905	0.793346	0.757738	0.78647	0.734163
Daam2	Daam2	0.832895	0.860566	0.821481	0.819917	0.817302	0.864298	0.853181	0.840066	0.822941	0.819829	0.818407	0.817422	0.865214	0.83983	0.868689	0.848302	0.91478	1	0.815457	0.73375	0.770315	0.781267	0.746329	0.701582	0.712017	0.741448	0.752261	0.755353	0.771151	0.787346	0.740876	0.756537	0.717203
Syt2	Syt2	0.799149	0.790972	0.79574	0.758595	0.77297	0.773035	0.783149	0.78949	0.794262	0.791344	0.798051	0.791297	0.803401	0.797068	0.794131	0.809321	0.832935	0.815457	1	0.754007	0.78254	0.753239	0.760435	0.704657	0.715703	0.732217	0.746835	0.757675	0.746582	0.781664	0.756725	0.771448	0.729887
Darc	Darc	0.849823	0.836167	0.830025	0.810172	0.792969	0.784992	0.814088	0.807434	0.850657	0.830704	0.790443	0.779887	0.768688	0.7544	0.726483	0.752877	0.747589	0.73375	0.754007	1	0.808873	0.749229	0.786248	0.739928	0.725224	0.825984	0.808123	0.814566	0.830938	0.811747	0.768143	0.76355	0.74471
Slc12a3	Slc12a3	0.855559	0.855758	0.832573	0.80403	0.810841	0.838463	0.83057	0.802108	0.830375	0.85007	0.793767	0.798074	0.804306	0.783027	0.756227	0.761216	0.766288	0.770315	0.78254	0.808873	1	0.743153	0.748278	0.725893	0.714026	0.768094	0.777482	0.777646	0.780612	0.781547	0.705335	0.744679	0.727457
B230317C12Rik	Fam69b	0.803805	0.810921	0.813293	0.795928	0.766241	0.768156	0.779292	0.817292	0.779145	0.740309	0.773565	0.804036	0.799955	0.764658	0.772799	0.782624	0.803432	0.781267	0.753239	0.749229	0.743153	1	0.782562	0.709264	0.70968	0.757769	0.73044	0.777622	0.820967	0.79375	0.756997	0.76495	0.719243
0610007P14Rik	C14orf1	0.813051	0.798084	0.804913	0.822788	0.784446	0.774551	0.802627	0.807446	0.824075	0.799931	0.835452	0.809415	0.790569	0.788814	0.776336	0.82829	0.797585	0.746329	0.760435	0.786248	0.748278	0.782562	1	0.747778	0.725113	0.78451	0.813465	0.817376	0.791361	0.80109	0.760039	0.797653	0.720903
Cnr1	Cnr1	0.77237	0.743895	0.781743	0.775851	0.747011	0.74453	0.760019	0.756982	0.718975	0.721772	0.798797	0.789141	0.7257	0.733738	0.718068	0.761681	0.701582	0.701582	0.704657	0.739928	0.725893	0.709264	0.747778	1	0.735251	0.755844	0.774191	0.798975	0.740858	0.72173	0.719775	0.731636	0.719377
Galnt13	Galnt13	0.722753	0.713405	0.72136	0.741847	0.7049	0.704657	0.708956	0.706385	0.705252	0.729967	0.754218	0.746916	0.721184	0.713326	0.738038	0.756894	0.722679	0.712017	0.715703	0.725224	0.714026	0.70968	0.725113	0.735251	1	0.713146	0.733812	0.737074	0.709221	0.736459	0.72001	0.732154	0.708222
Mpp3	Mpp3	0.863595	0.824304	0.859058	0.84776	0.8264	0.7797	0.833436	0.831375	0.832382	0.785955	0.80413	0.797443	0.767822	0.743711	0.750628	0.764775	0.753822	0.741448	0.732217	0.825984	0.768094	0.757769	0.78451	0.755844	0.713146	1	0.844705	0.840154	0.828226	0.814804	0.800176	0.804454	0.735372
D530033C11Rik	Utp23	0.840263	0.808889	0.851696	0.832484	0.819936	0.79182	0.844493	0.817842	0.823236	0.812872	0.825971	0.808525	0.774732	0.768845	0.757017	0.783734	0.754192	0.752261	0.746835	0.808123	0.777482	0.73044	0.813465	0.774191	0.733812	0.844705	1	0.844885	0.814841	0.82722	0.815929	0.790951	0.75702
Coro2b	Coro2b	0.864851	0.824214	0.880035	0.861971	0.824229	0.78885	0.829135	0.807202	0.841968	0.765668	0.818223	0.813073	0.777192	0.753496	0.774914	0.793366	0.762041	0.755353	0.757675	0.814566	0.777646	0.777622	0.817376	0.798975	0.737074	0.840154	0.844885	1	0.833653	0.821137	0.813808	0.809088	0.744944
Trim3	Trim3	0.867596	0.868205	0.881619	0.854748	0.834179	0.814472	0.831665	0.839213	0.863003	0.820663	0.782132	0.803406	0.79783	0.772895	0.753488	0.764523	0.775905	0.771151	0.746582	0.830938	0.780612	0.820967	0.791361	0.740858	0.709221	0.828226	0.814841	0.833653	1	0.841033	0.815845	0.787224	0.761539
C230009H10Rik	NaN	0.816832	0.810748	0.833111	0.825012	0.805778	0.762859	0.815911	0.810841	0.83605	0.807082	0.799635	0.804439	0.777303	0.764561	0.766915	0.795717	0.793346	0.787346	0.781664	0.811747	0.781547	0.79375	0.80109	0.72173	0.736459	0.814804	0.82722	0.821137	0.841033	1	0.825504	0.794719	0.745495
Astn2	ASTN2	0.789905	0.784867	0.831629	0.806754	0.779836	0.717846	0.776344	0.77395	0.792893	0.739682	0.79817	0.800121	0.752163	0.75755	0.757836	0.795571	0.757738	0.740876	0.756725	0.768143	0.705335	0.756997	0.760039	0.719775	0.72001	0.800176	0.815929	0.813808	0.815845	0.825504	1	0.819159	0.733994
Grm4	Grm4	0.822173	0.815042	0.832996	0.838894	0.780029	0.759867	0.808944	0.796757	0.802146	0.775775	0.826843	0.798389	0.803961	0.74683	0.767142	0.80199	0.78647	0.756537	0.771448	0.76355	0.744679	0.76495	0.797653	0.731636	0.732154	0.804454	0.790951	0.809088	0.787224	0.794719	0.819159	1	0.731602
Ptchd1	Ptchd1	0.770056	0.754298	0.782504	0.752774	0.751194	0.725921	0.737721	0.773328	0.755437	0.737588	0.746865	0.748973	0.745538	0.722631	0.715419	0.735248	0.734163	0.717203	0.729887	0.74471	0.727457	0.719243	0.720903	0.719377	0.708222	0.735372	0.75702	0.744944	0.761539	0.745495	0.733994	0.731602	1
The pairwise co-expression values between all 33 genes in Clique I are depicted and color-coded. The four genes already associated with autism are highlighted in yellow.
