# Supplementary material for: Co-expression Profiling of Autism Genes in the Mouse Brain
Source: PLoS Comput Biol. 2013 Jul 25;9(7):e1003128. doi: 10.1371/journal.pcbi.1003128 (PMC3723491; doi:10.1371/journal.pcbi.1003128)
Supplement: Table S3 — Co-expression of genes in Clique II. The pairwise co-expression values between all six genes in Clique II are depicted and color-coded. The two genes already associated with autism are highlighted in yellow. (XLSX) [file pcbi.1003128.s005.xlsx]

## Sheet: Clique 2
gene name	Official symbole	Astn2	4933417O08Rik	Car10	Rims3	LOC434631	B230308C24Rik*
Astn2	ASTN2	1	0.81377	0.815624	0.795032	0.831629	0.825572
4933417O08Rik	GOLGA7B	0.81377	1	0.875456	0.796388	0.91795	0.816099
Car10	CA10	0.815624	0.875456	1	0.819447	0.882666	0.84026
Rims3	RIMS3	0.795032	0.796388	0.819447	1	0.827782	0.903264
LOC434631	NaN	0.831629	0.91795	0.882666	0.827782	1	0.847524
B230308C24Rik*	NaN	0.825572	0.816099	0.84026	0.903264	0.847524	1
The pairwise co-expression values between all 6 genes in Clique II are depicted and color-coded. The two genes already associated with autism are highlighted in yellow.
