# Supplementary material for: Co-expression Profiling of Autism Genes in the Mouse Brain
Source: PLoS Comput Biol. 2013 Jul 25;9(7):e1003128. doi: 10.1371/journal.pcbi.1003128 (PMC3723491; doi:10.1371/journal.pcbi.1003128)
Supplement: Table S5 — Results of the Bioconductor GOstat analysis for genes belonging to Clique I. (DOC) [file pcbi.1003128.s007.doc]

**Supplementary Table S5:** Results of the Bioconductor GOstat analysis for genes belonging to Clique I

| **GO Category** | **GO term** | **Cut off** | **P-value** | **No. of genes** | **Genes** |
| --- | --- | --- | --- | --- | --- |
| Biological process | regulation of cellular catabolic process | 2X | 0.0475 | 3 | SOCS5, S1PR1, CNR1 |
| cytokine-mediated signaling pathway | 0.027676 | 3 | SOCS5, CAMK2D, DARC |
| generation of a signal involved in cell-cell signaling | 0.022074 | 3 | SLC6A1, SYT2, CNR1 |
| cellular homeostasis | 0.034879 | 4 | DPP6, CAMK2D, S1PR1, CNR1 |
| cellular ion homeostasis | 0.018297 | 4 | DPP6, CAMK2D, S1PR1, CNR1 |
| regulation of system process | 0.00792 | 4 | ATP1A1, CAMK2D, SLC6A1, CNR1 |
| actin cytoskeleton organization | 0.006292 | 4 | S1PR1, MTSS1, DAAM2, CORO2B |
| monovalent inorganic cation transport | 0.00155 | 4 | ATP1A1, DPP6, SLC12A3, KCNC1 |
| system process | 0.041776 | 5 | DPP6, S1PR1, SYT2 , KCNC1, PTCHD1 |
| lipid metabolic process | 0.048759 | 5 | ATP1A1, PLTP, PLA2G7, C14orf1, CNR1 |
| regulation of transport | 0.029259 | 5 | ATP1A1, DPP6, CAMK2D, SLC6A1, CNR1 |
| transmission of nerve impulse | 0.001842 | 5 | DPP6, S1PR1, SYT2, KCNC1, CAMK2D |
| ion transport | 0.000733 | 7 | ATP1A1, DPP6, CA4, CAMK2D, SLC12A3, CNR1, KCNC1 |
| cytokine-mediated signaling pathway | Median | 0.027676 | 3 | SOCS5, CAMK2D, DARC |
| generation of a signal involved in cell-cell signaling | 0.022074 | 3 | SLC6A1, SYT2, CNR1 |
| cellular ion homeostasis | 0.018297 | 4 | DPP6, CAMK2D, S1PR1, CNR1 |
| regulation of system process | 0.00792 | 4 | ATP1A1, CAMK2D, SLC6A1, CNR1 |
| actin cytoskeleton organization | 0.006292 | 4 | S1PR1, MTSS1, DAAM2, CORO2B |
| monovalent inorganic cation transport | 0.00155 | 4 | ATP1A1, DPP6, SLC12A3, KCNC1 |
| transmission of nerve impulse | 0.001842 | 5 | DPP6, S1PR1, SYT2, KCNC1, CAMK2D |
| ion transport | 0.000733 | 7 | ATP1A1, DPP6, CA4, CAMK2D, SLC12A3, CNR1, KCNC1 |
| Cellular component | cytoplasmic membrane-bounded vesicle | 2X | 0.041902 | 3 | ATP1A1, CAMK2D, MTSS1 |
| cytoplasmic vesicle part | 0.03219 | 3 | CA4, CAMK2D, SYT2 |
| vesicle membrane | 0.024074 | 3 | CA4, CAMK2D, SYT2 |
| secretory granule | 0.009452 | 3 | CHGB, CA4, SYT2 |
| sarcolemma | 0.000584 | 3 | ATP1A1, CA4, CAMK2D |
| intrinsic to plasma membrane | 0.006199 | 7 | ATP1A1, CA4, SLC6A1, SLC12A3, CNR1, MPP3, KCNC1 |
| vesicle | 0.001134 | 7 | ATP1A1, CHGB, CA4, CAMK2D, MTSS1,SYT2, C14orf1 |
| cytoplasmic vesicle part | Median | 0.03219 | 3 | CA4, CAMK2D, SYT2 |
| vesicle membrane | 0.024074 | 3 | CA4, CAMK2D, SYT2 |
| secretory granule | 0.009452 | 3 | CHGB, CA4, SYT2 |
| sarcolemma | 0.000584 | 3 | ATP1A1, CA4, CAMK2D |
| vesicle | 0.001134 | 7 | ATP1A1, CHGB, CA4, CAMK2D, MTSS1,SYT2, C14orf1 |
| Molecular Function | inorganic cation transmembrane transporter activity | 2X | 0.049636 | 3 | ATP1A1, SLC6A1, KCNC1 |
| actin binding | 0.022207 | 3 | SYNE1 , DAAM2, CORO2B |
| active transmembrane transporter activity | 0.024112 | 3 | ATP1A1, SLC6A1, SLC12A3 |
| ion transmembrane transporter activity | 0.039485 | 4 | ATP1A1, SLC6A1, SLC12A3, KCNC1 |
| signaling receptor activity | 0.033413 | 5 | S1PR1, GPR37L1, DARC, CNR1, PTCHD1 |
| inorganic cation transmembrane transporter activity | Median | 0.049636 | 3 | ATP1A1, SLC6A1, KCNC1 |
| actin binding | 0.022207 | 3 | SYNE1 , DAAM2, CORO2B |
| active transmembrane transporter activity | 0.024112 | 3 | ATP1A1, SLC6A1, SLC12A3 |
|  |  |  |  |
